# Supplementary material for: South Georgia marine productivity over the past 15 ka and implications for glacial evolution
Source: Copernicus journal article supplement (doi:10.5194/jm-43-165-2024), 2024-06-18
Supplement: Supplementary file 1 [file jm-43-165-2024-supplement.zip]

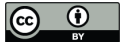

*Supplement of*

**South Georgia marine productivity over the past 15 ka and implications for glacial evolution**

**Jack T. R. Wilkin et al.**

*Correspondence to:* Jack T. R. Wilkin ([jack.wilkin@btinternet.com](mailto:jack.wilkin@btinternet.com), [jw923@exeter.ac.uk](mailto:jw923@exeter.ac.uk))

- [jm-43-165-2024-supplement-title-page.pdf](#)
- [Wilkin et al. 2024\\_Data.xlsx](#)
- [Wilkin et al. 2024\\_Supplementary Figures.pdf](#)

The copyright of individual parts of the supplement might differ from the article licence.
