# Supplementary material for: South Georgia marine productivity over the past 15 ka and implications for glacial evolution
Source: Copernicus journal article supplement (doi:10.5194/jm-43-165-2024), 2024-06-18
Supplement: Supplementary file 2 [file jm-43-165-2024-supplement.zip]

## GC666

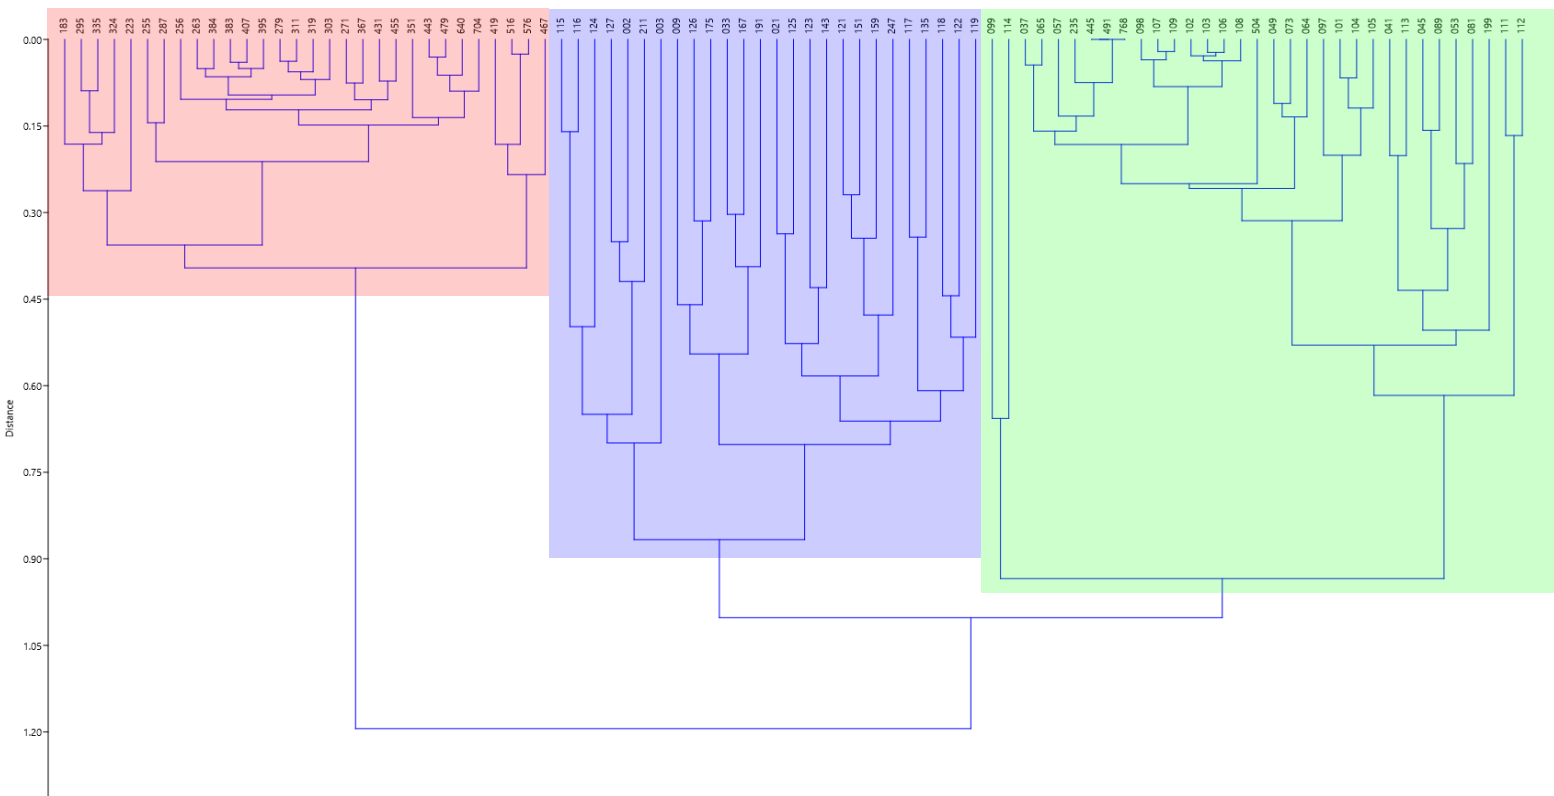

## GC673

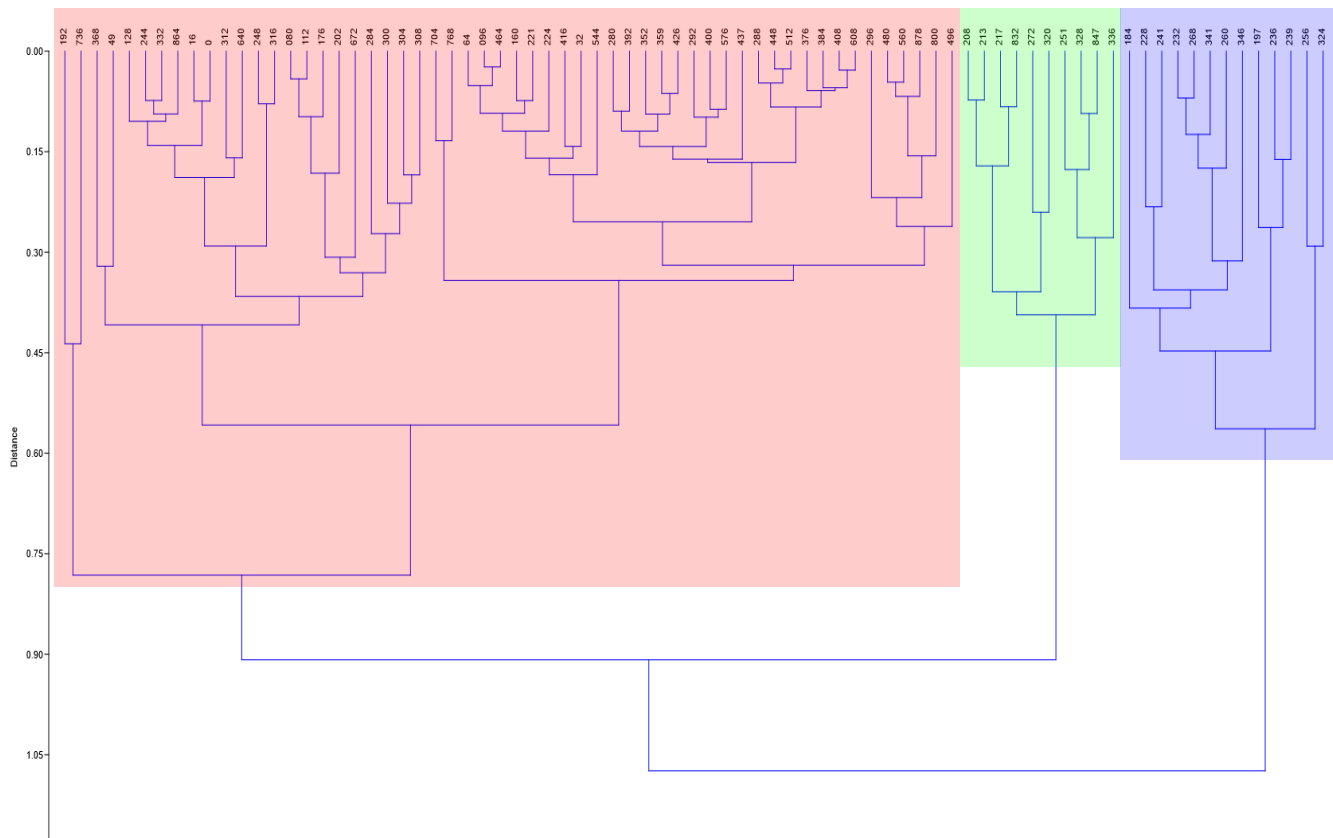

Figure S1: Results of Cluster Analysis from foraminifera (relative abundance of species >1%) shows three assemblages. Red - *F. fusiformis* assemblage blue = *C. parkerianus* assemblage; green = *M. earlandi* assemblage.

## GC666

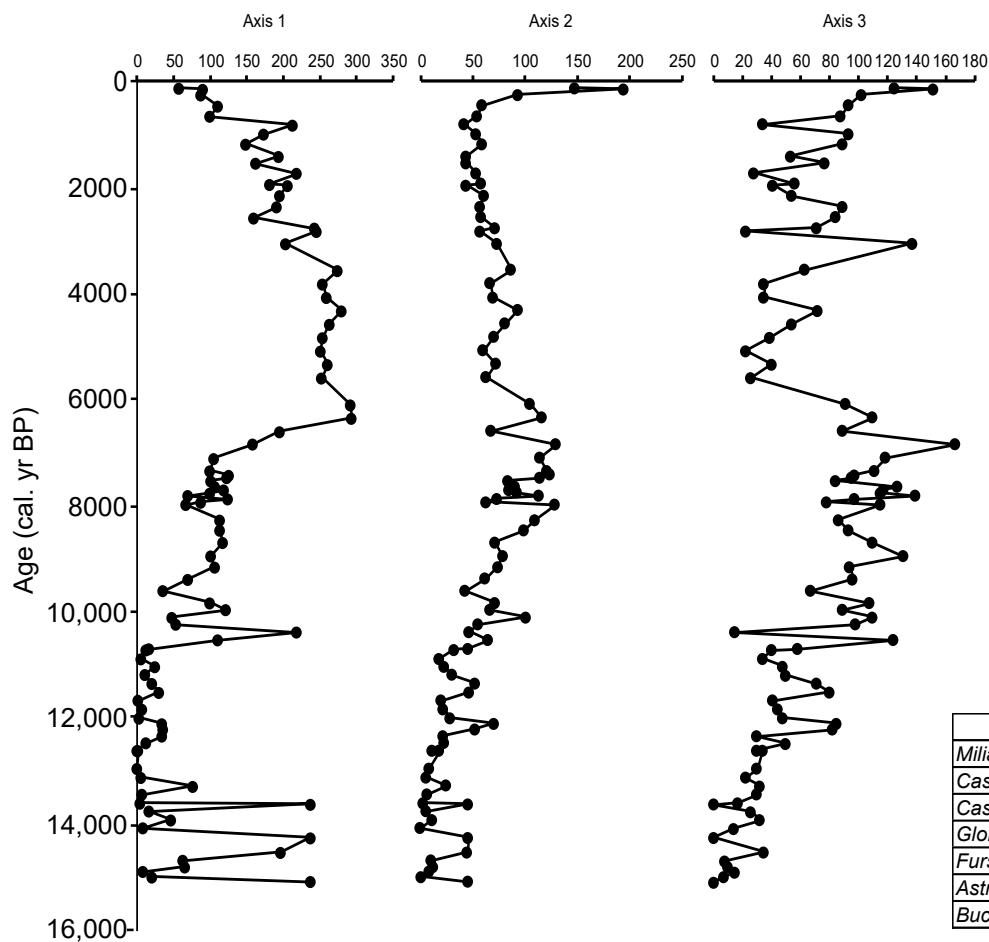

## GC673

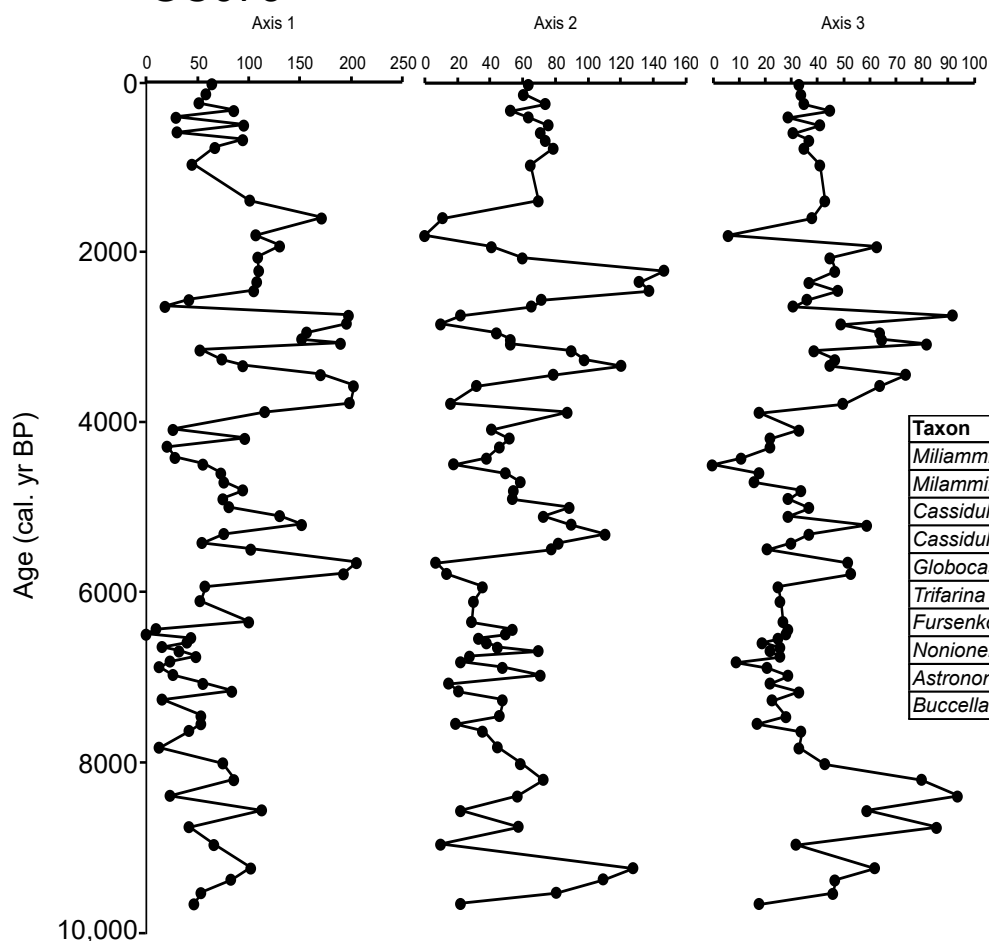

Figure S2: Detrended correspondence analysis (DCA) values from foraminifera (relative abundance of species >1%) showing the dominant axis and the weights of each species.
